# Supplementary material for: A cancer cell-specific two-photon fluorescent probe for imaging hydrogen sulfide in living cells
Source: Royal Society of Chemistry journal article supplement (doi:10.1039/c7ra01479a), 2017-01-01
Supplement: c7ra01479a1.pdf [file c7ra01479a1.pdf]

**Electronic Supplementary data For**

**A cancer cell-specific two-photon fluorescent probe for imaging  
hydrogen sulfide in living cells**

Xuezhen Song, Baoli Dong, Xiuqi Kong, Chao Wang, Nan Zhang, Weiyin Lin\*

Institute of Fluorescent Probes for Biological Imaging, School of Chemistry and  
Chemical Engineering, School of Materials Science and Engineering, University of  
Jinan, Jinan, Shandong 250022, P.R. China

\*Corresponding Author.

Tel.: +86 53182769108.

*E-mail address:* weiyinlin2013@163.com.

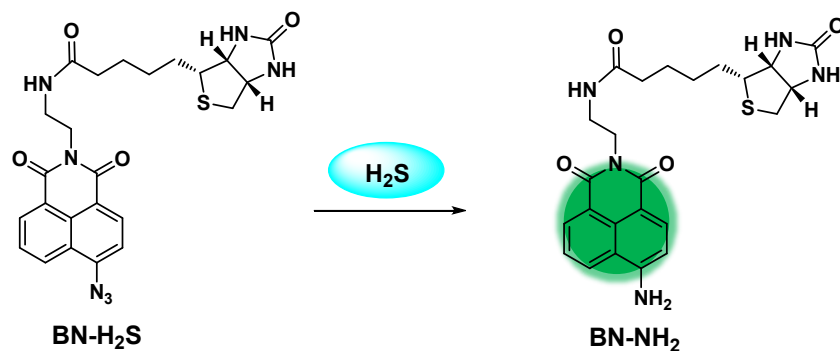

Scheme S1. Proposed response mechanism of **BN-H<sub>2</sub>S** to H<sub>2</sub>S.

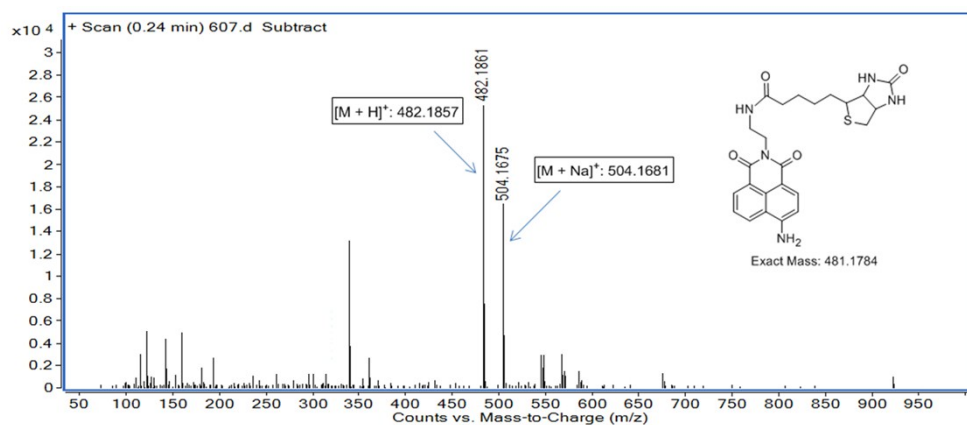

Fig. S1. HRMS study of the product of **BN-H<sub>2</sub>S** with Na<sub>2</sub>S (80 equiv) in PBS (pH 7.4, 20 mM, 5% MeOH) at room temperature.

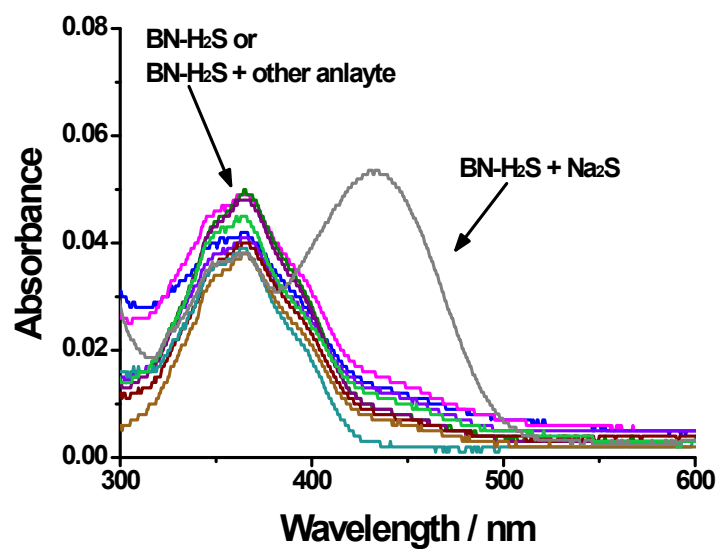

Fig. S2. Absorption spectra of 5  $\mu\text{M}$  **BN-H<sub>2</sub>S** to various species in PBS buffer (pH 7.4, 20 mM, 5% MeOH).

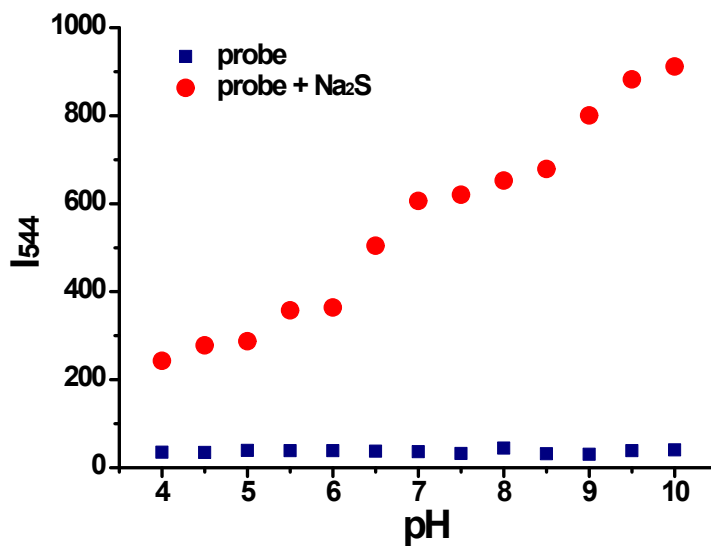

Fig. S3. Fluorescence intensity at 544 nm of 5  $\mu\text{M}$  **BN-H<sub>2</sub>S** in absence and presence of 100  $\mu\text{M}$  **Na<sub>2</sub>S** at different pH under excitation at 440 nm.

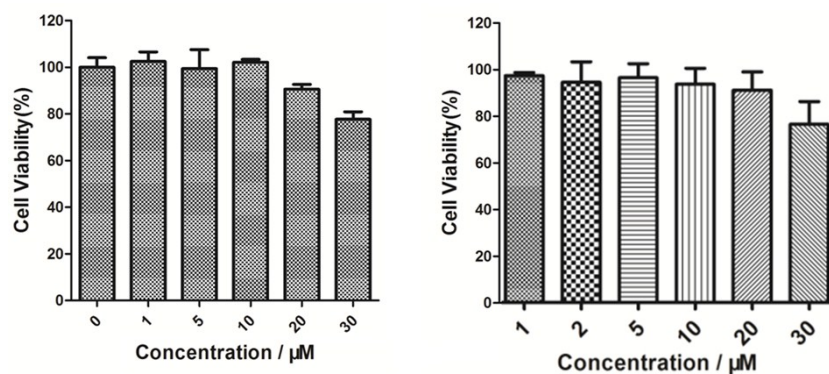

Fig. S4. Cytotoxicity of **BN-H<sub>2</sub>S** in HeLa cells (left) and NIH 3T3 cells (right). The cell viability was measured by a standard MTT assay.

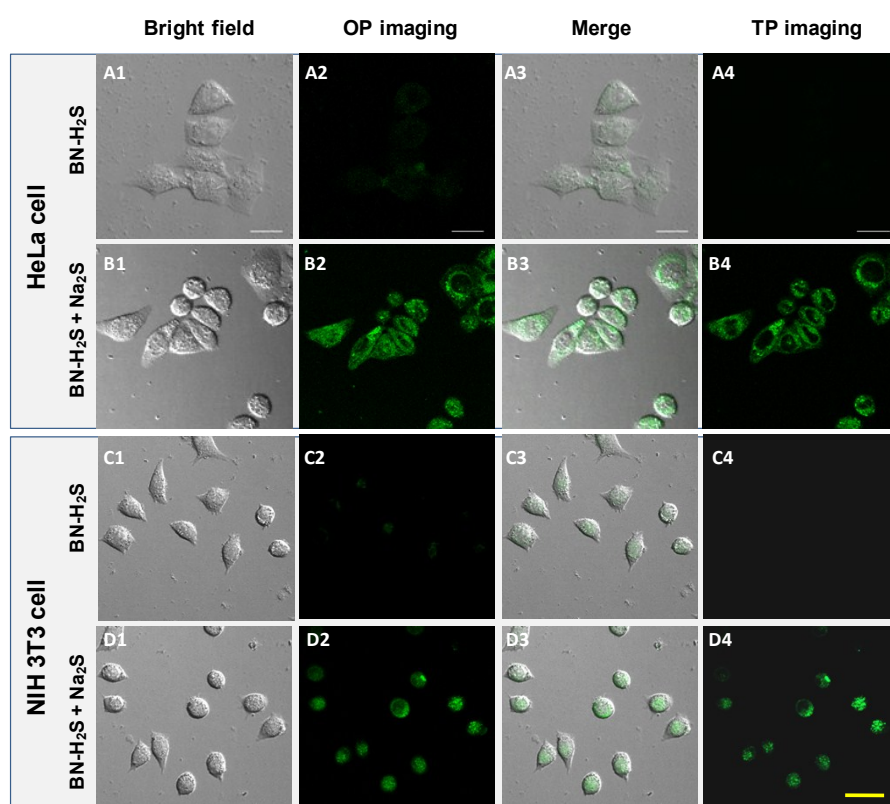

Fig. S5. (A) Fluorescence images of HeLa cells treated with 10 μM **BN-H<sub>2</sub>S**. (B) Fluorescence images of HeLa cells treated with 10 μM **BN-H<sub>2</sub>S** and 100 μM Na<sub>2</sub>S. (C) Fluorescence images of NIH 3T3 cells treated with 10 μM **BN-H<sub>2</sub>S**. (D) Fluorescence images of NIH 3T3 cells treated with 10 μM **BN-H<sub>2</sub>S** and 100 μM Na<sub>2</sub>S. One-photon (OP) imaging: emission at 500-550 nm with excitation at 488 nm; Two-photon (TP) imaging: emission at 500-550 nm with excitation at 760 nm. Scale bar = 20 μm.

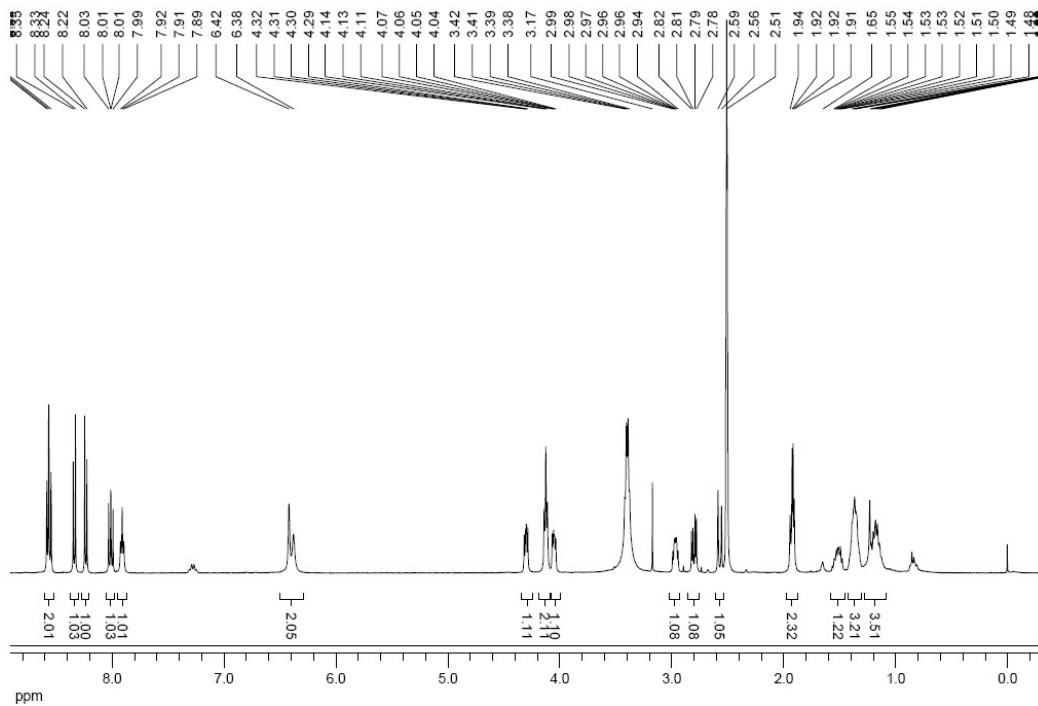

F

ig. S6.  $^1\text{H}$  NMR spectrum ( $\text{DMSO-}d_6$ ) of compound **2**.

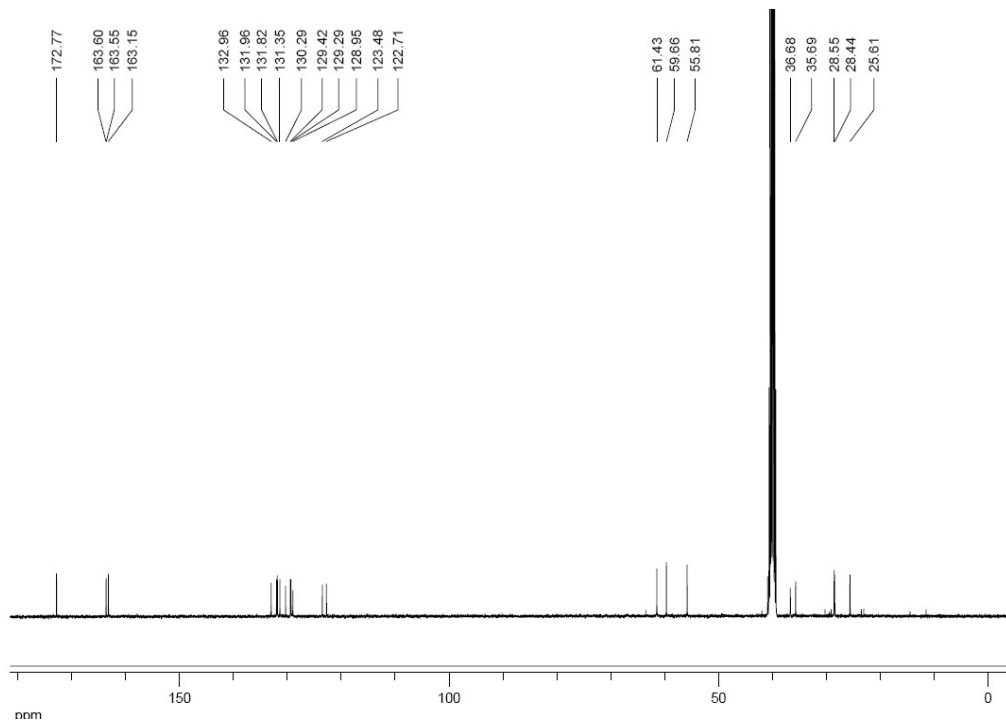

Fi

g. S7.  $^{13}\text{C}$  NMR spectrum ( $\text{DMSO-}d_6$ ) of compound **2**.

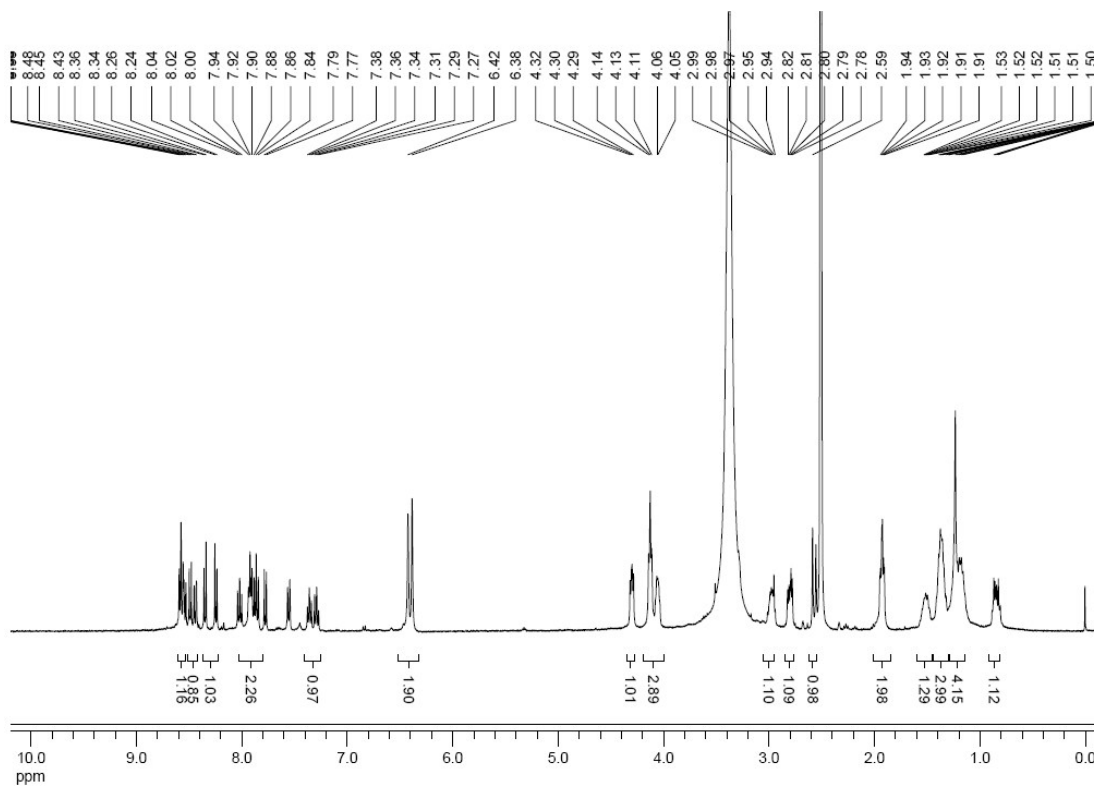

Fig. S8.  $^1\text{H}$  NMR spectrum ( $\text{DMSO-}d_6$ ) of compound **BN- $\text{H}_2\text{S}$**

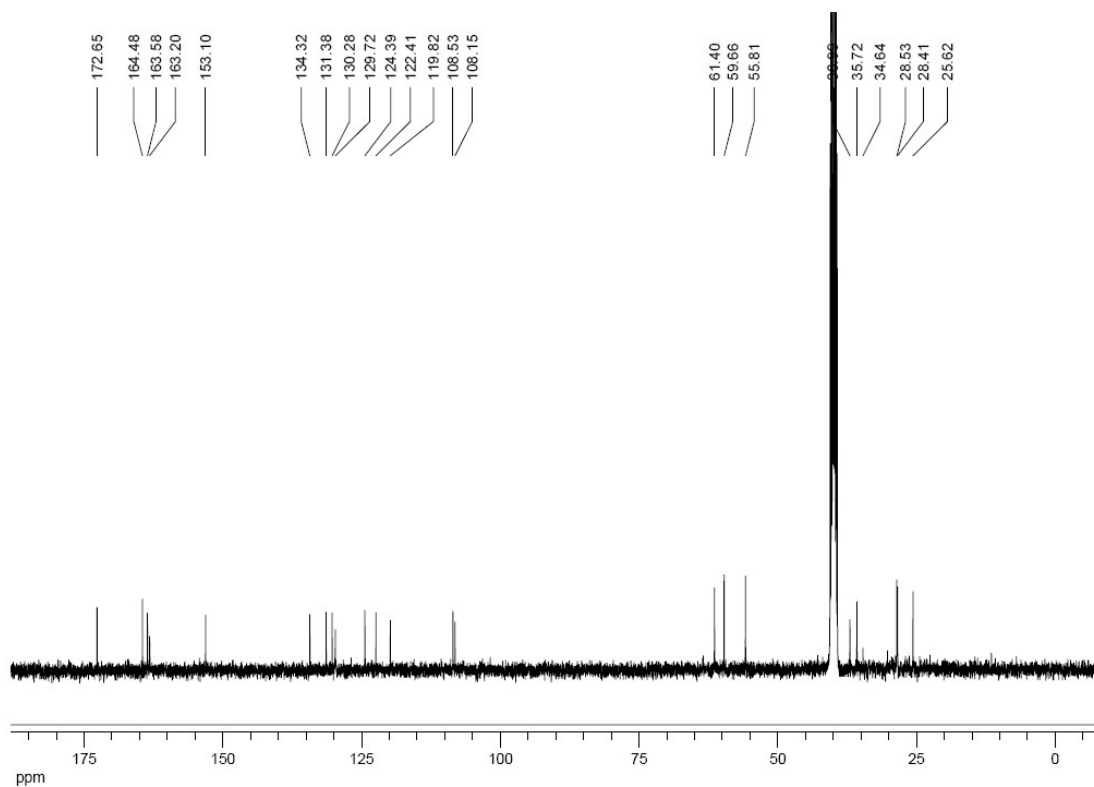

Fig. S9.  $^{13}\text{C}$  NMR spectrum ( $\text{DMSO-}d_6$ ) of compound **BN- $\text{H}_2\text{S}$**

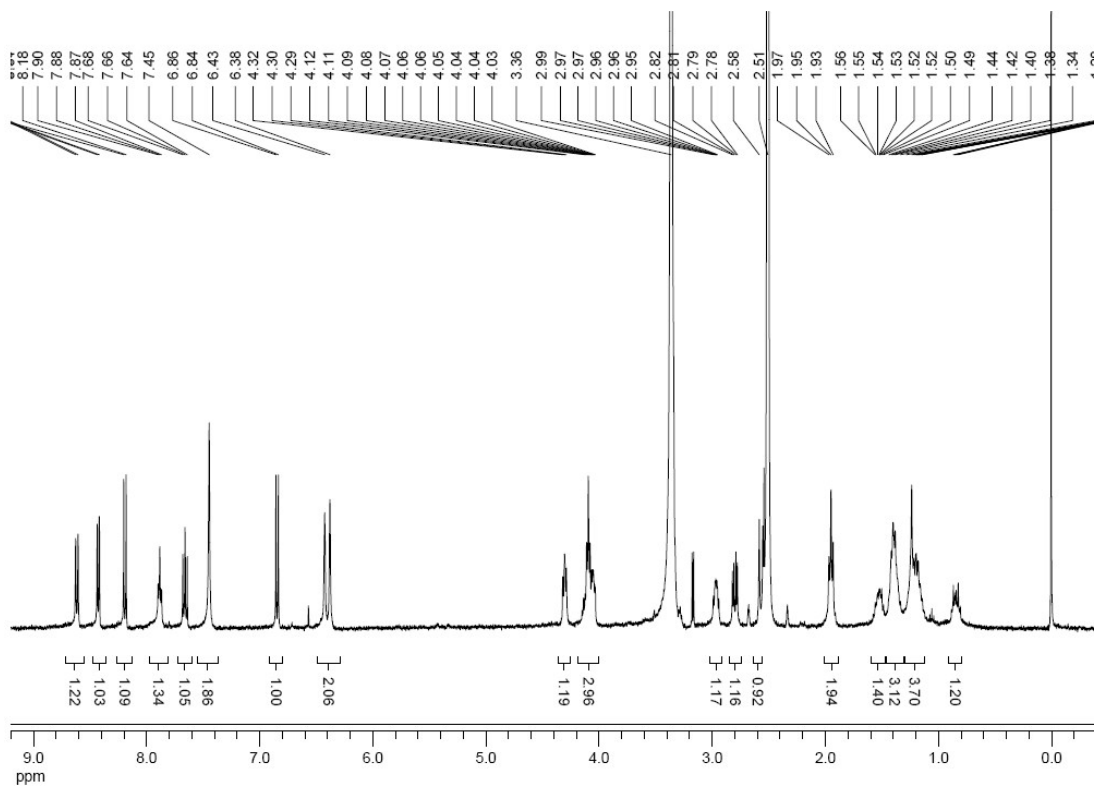

Fig. S10.  $^1\text{H}$  NMR spectrum ( $\text{DMSO-}d_6$ ) of compound **BN-NH<sub>2</sub>**

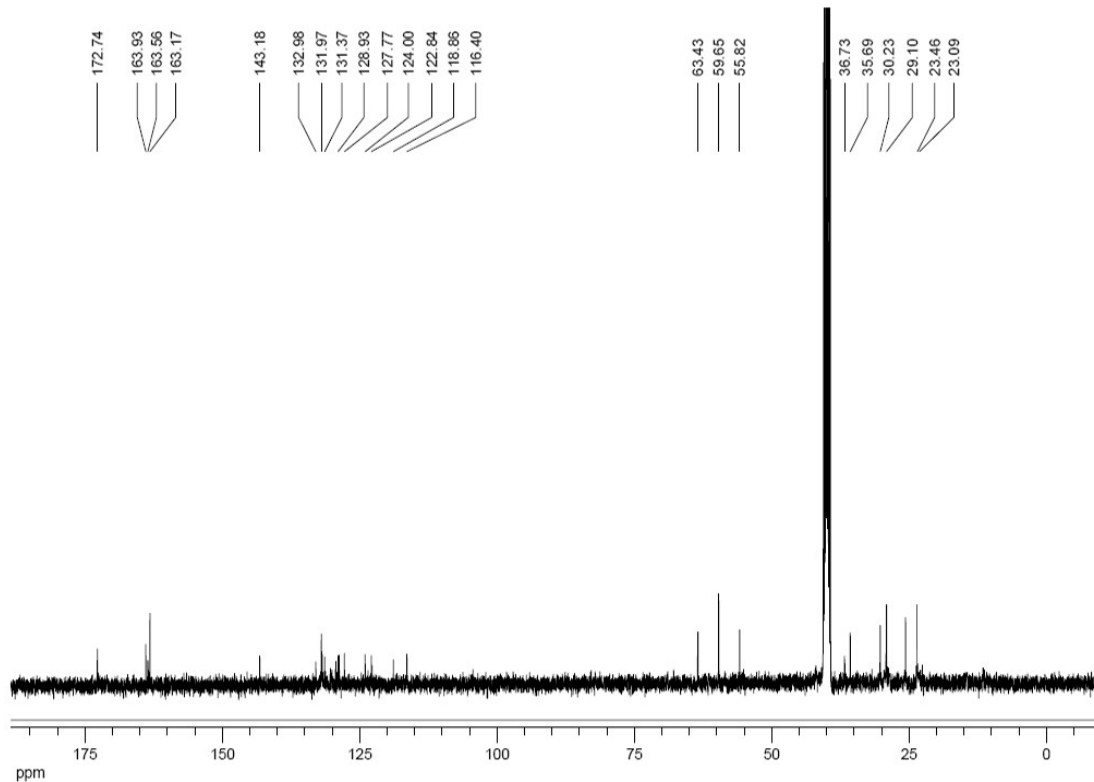

Fig. S11.  $^{13}\text{C}$  NMR spectrum ( $\text{DMSO-}d_6$ ) of compound **BN-NH<sub>2</sub>**
